# Supplementary material
Source: publisher site journal article supplement (https://www.spandidos-publications.com/4337/downloadSupplementary)

Figure S1. Scatter plots and histograms from flow cytometric analysis for the determination of GSH levels in the HeLa cell line treated with grape stem extract derived from the Mavrodaphne variety. GSH, glutathione.

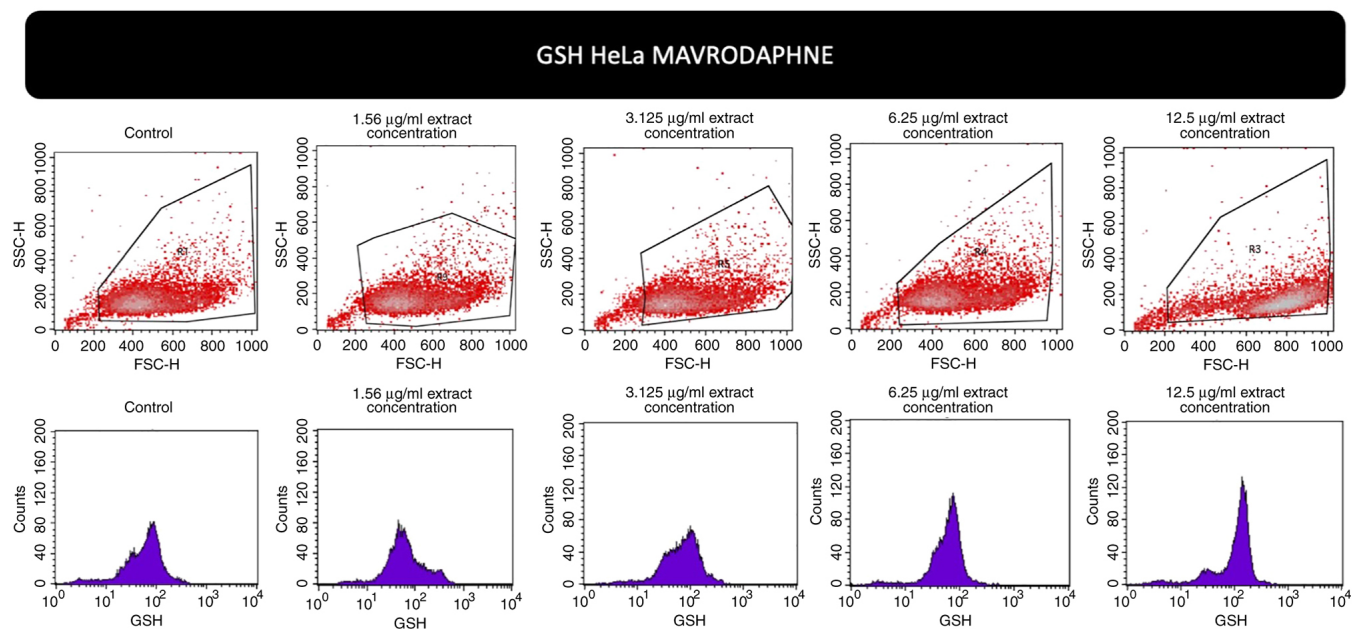

Figure S2. Scatter plots and histograms from flow cytometric analysis for the determination of ROS levels in the HeLa cell line treated with grape stem extract derived from the Mavrodaphne variety. ROS, reactive oxygen species.

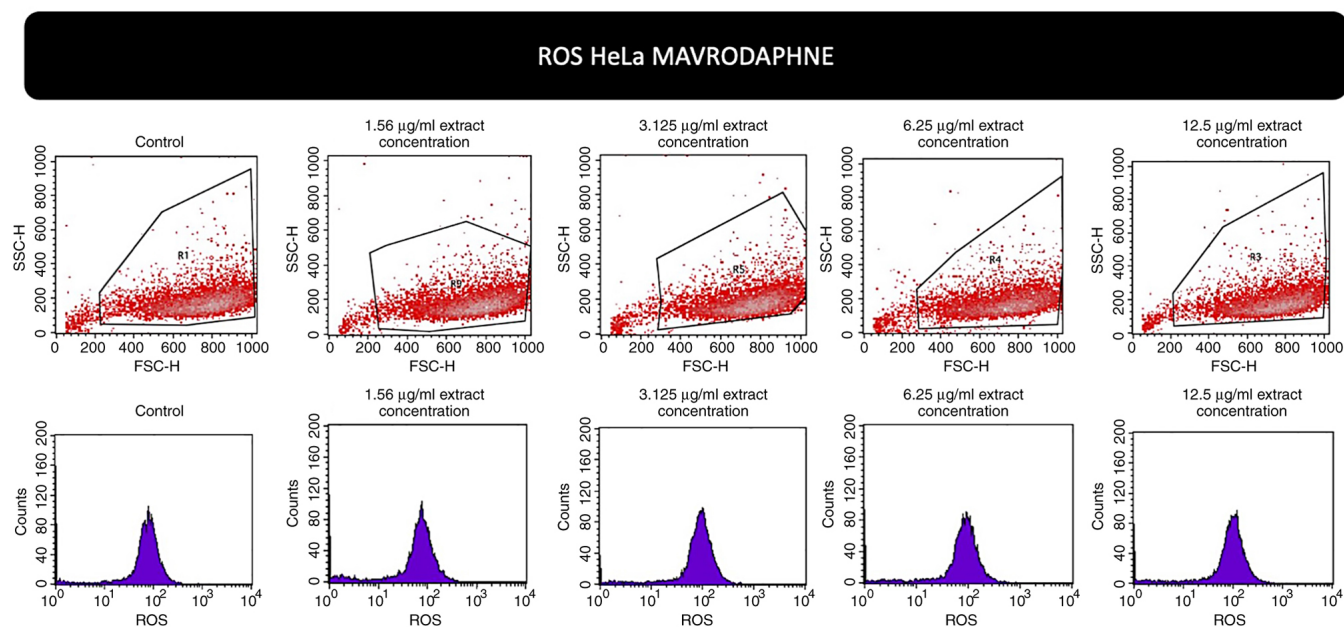

Figure S3. Scatter plots and histograms from flow cytometric analysis for the determination of GSH levels in the HepG2 cell line treated with grape stem extract derived from the Mavrodaphne variety. GSH, glutathione.

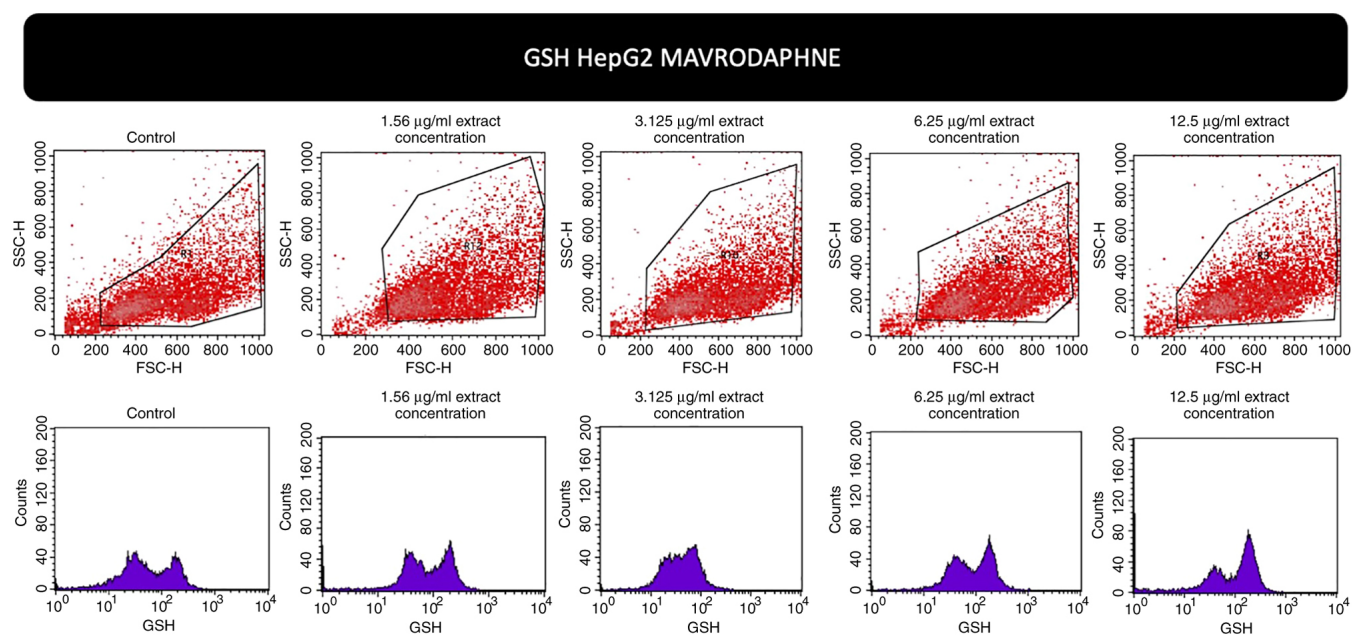

Figure S4. Scatter plots and histograms from flow cytometric analysis for the determination of ROS levels in the HepG2 cell line treated with grape stem extract derived from the Mavrodaphne variety. ROS, reactive oxygen species.

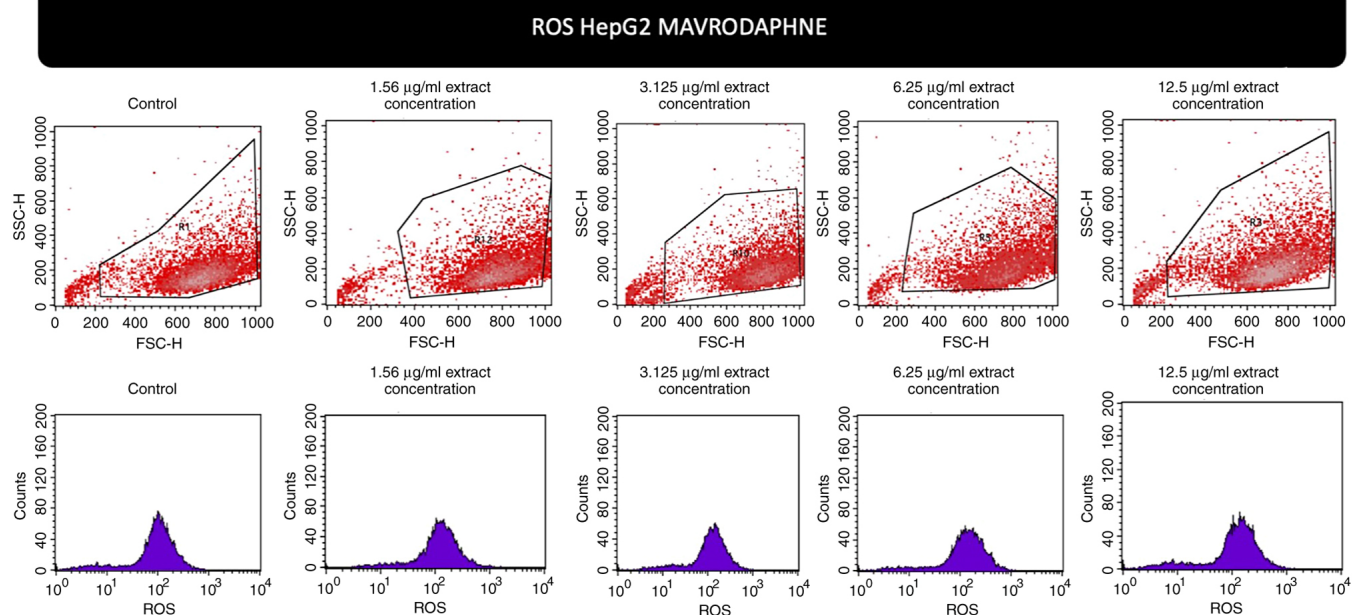



Figure S5. Scatter plots and histograms from flow cytometric analysis for the determination of GSH levels in the HeLa cell line treated with grape stem extract derived from the Muscat variety. GSH, glutathione.

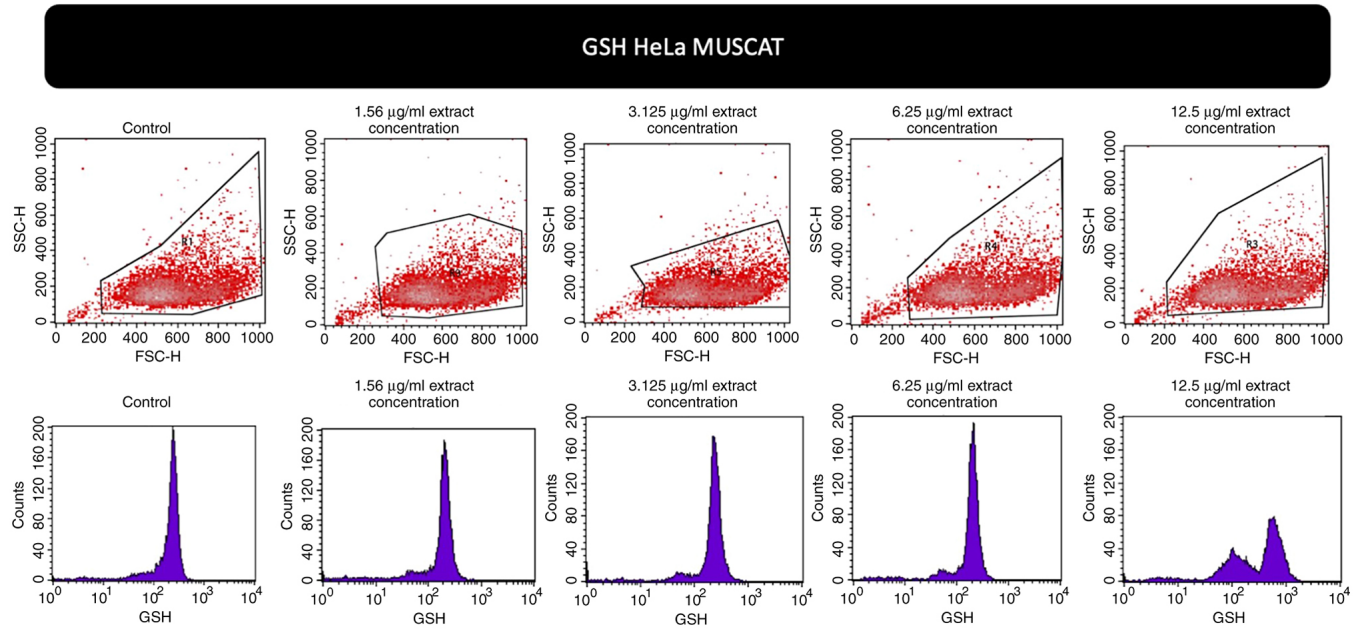

Figure S6. Scatter plots and histograms from flow cytometric analysis for the determination of ROS levels in the HeLa cell line treated with grape stem extract derived from the Muscat variety. ROS, reactive oxygen species.

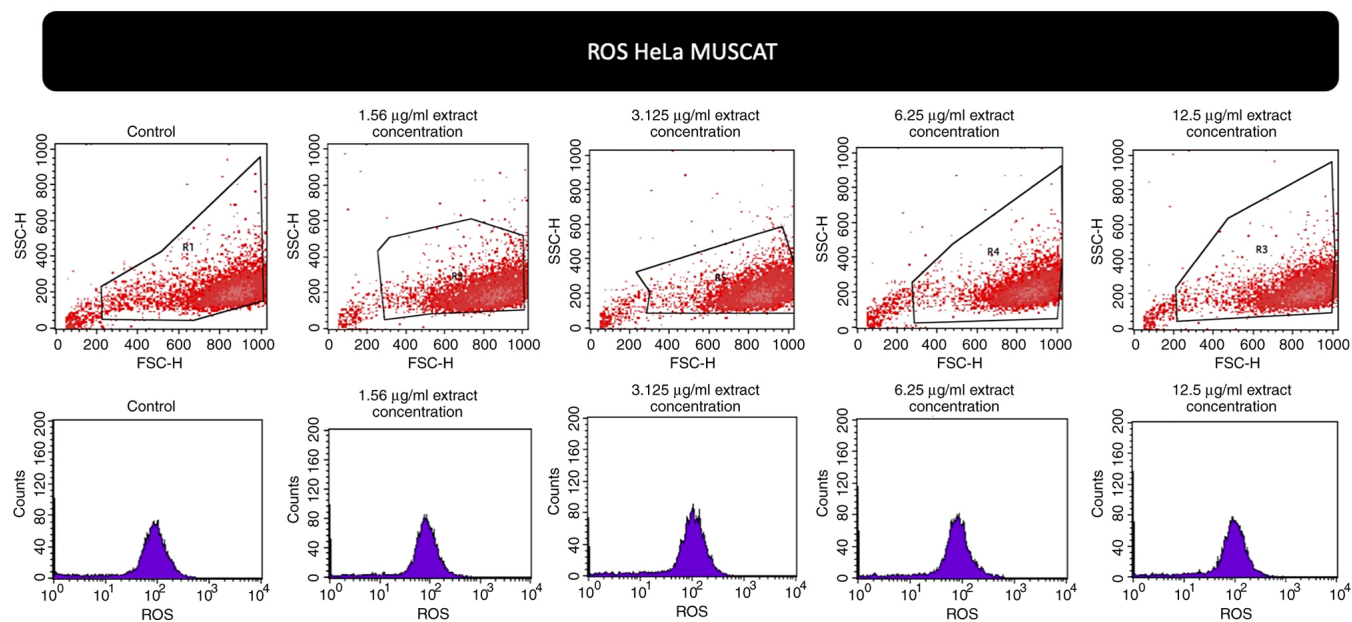

Figure S7. Scatter plots and histograms from flow cytometric analysis for the determination of GSH levels in the HepG2 cell line treated with grape stem extract derived from the Muscat variety. GSH, glutathione.

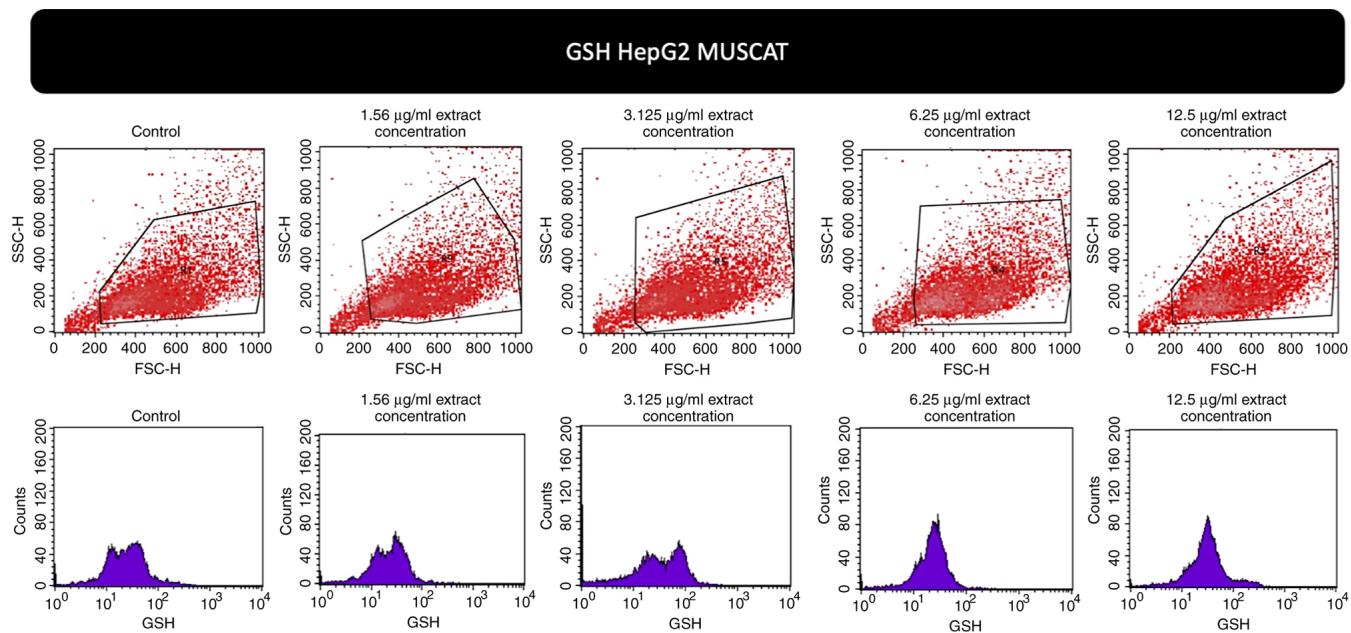

Figure S8. Scatter plots and histograms from flow cytometric analysis for the determination of ROS levels in the HepG2 cell line treated with grape stem extract derived from the Muscat variety. ROS, reactive oxygen species.

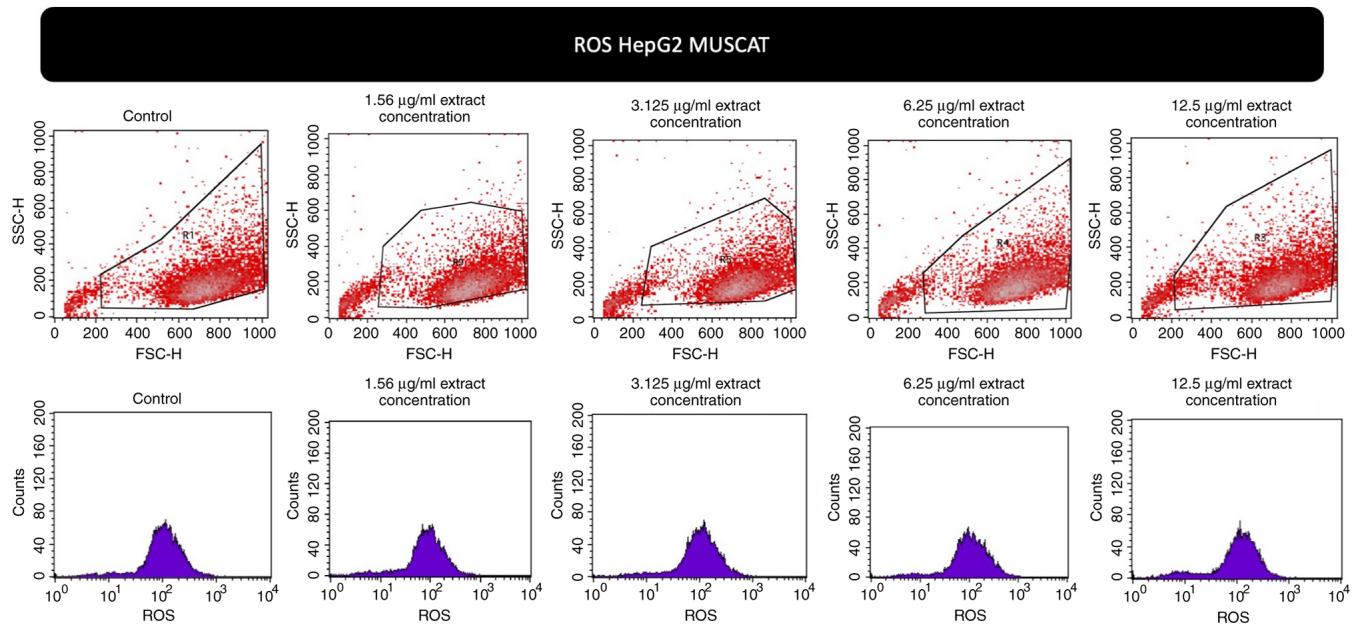

Figure S9. Scatter plots and histograms from flow cytometric analysis for the determination of GSH levels in the HeLa cell line treated with grape stem extract derived from the Rhoditis variety. GSH, glutathione.

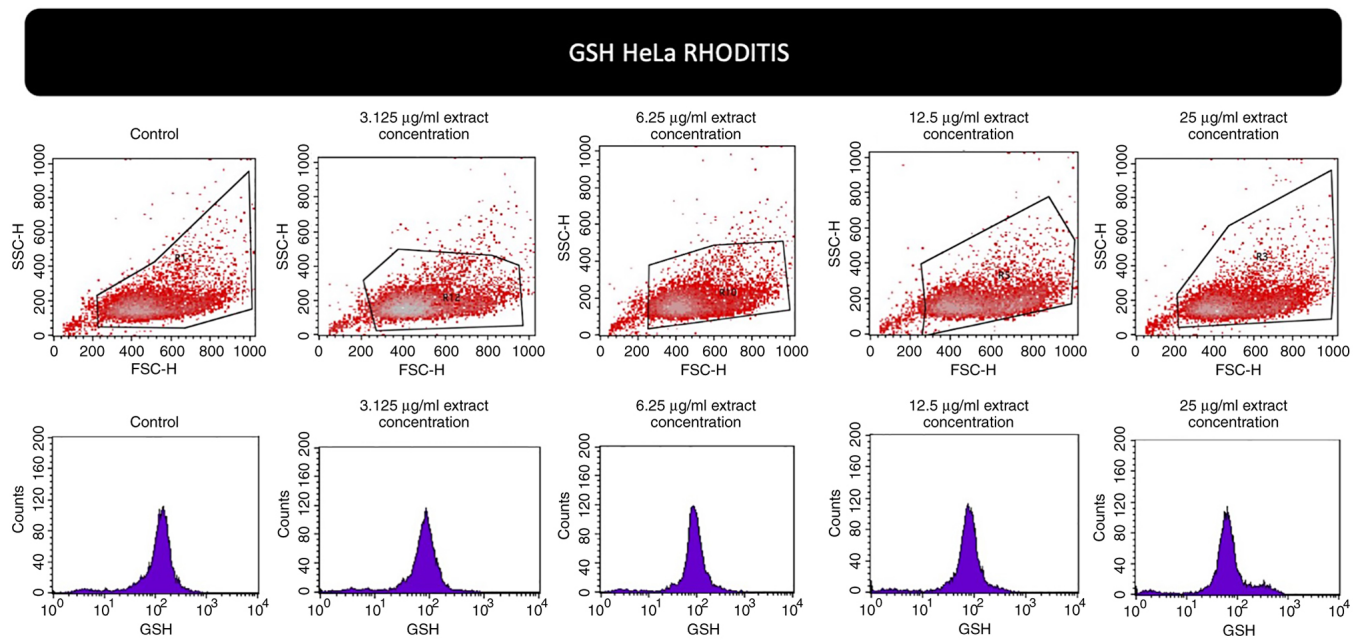

Figure S10. Scatter plots and histograms from flow cytometric analysis for the determination of ROS levels in the HeLa cell line treated with grape stem extract derived from the Rhoditis variety. ROS, reactive oxygen species.

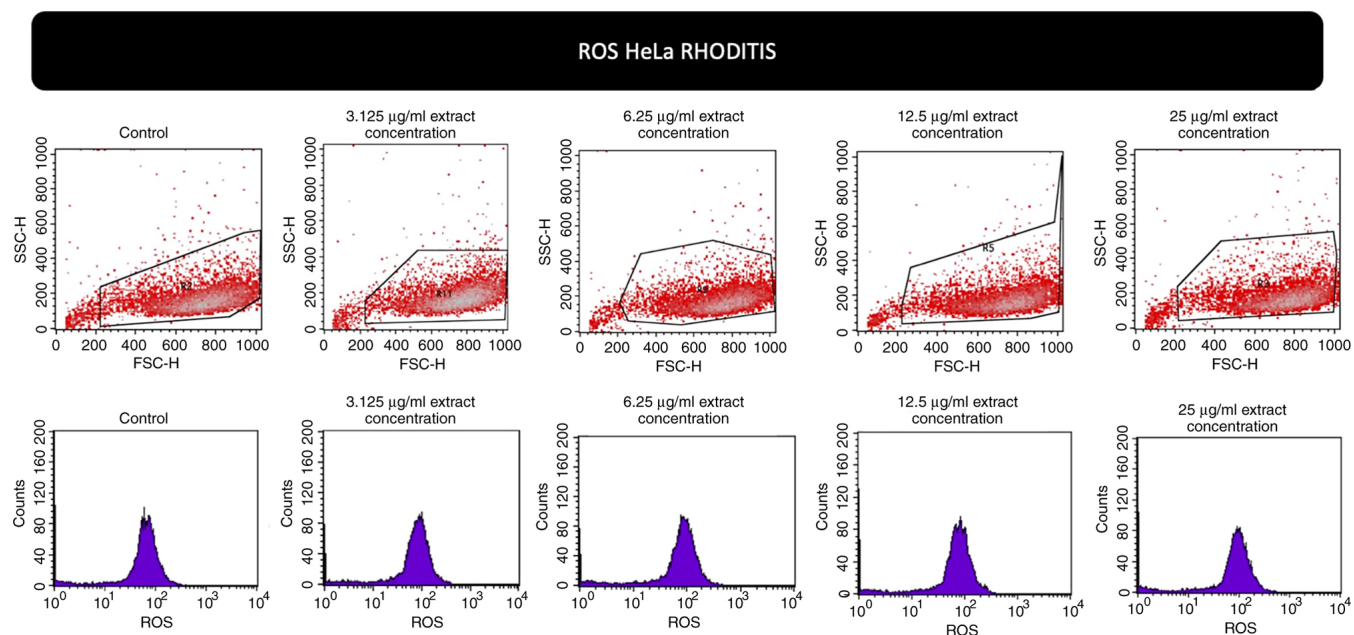

Figure S11. Scatter plots and histograms from flow cytometric analysis for the determination of GSH levels in the HepG2 cell line treated with grape stem extract derived from the Rhoditis variety. GSH, glutathione.

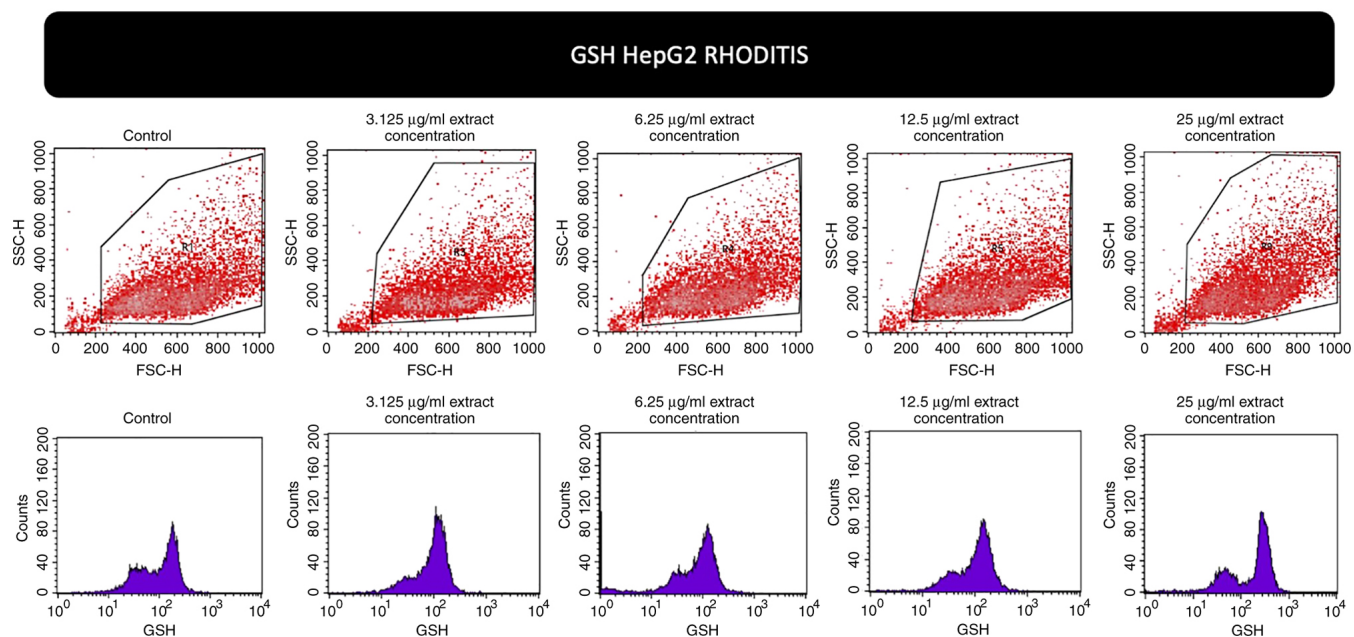



Figure S12. Scatter plots and histograms from flow cytometric analysis for the determination of ROS levels in the HepG2 cell line treated with grape stem extract derived from the Rhoditis variety. ROS, reactive oxygen species.

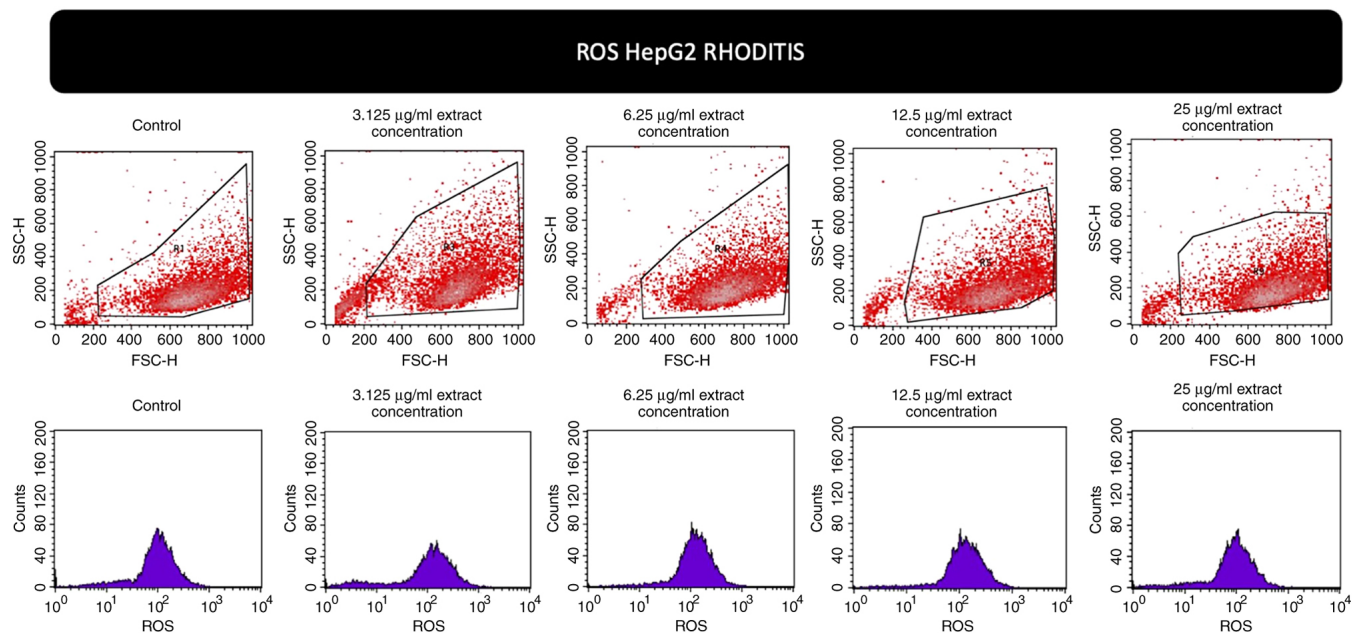

Supplement: Supplementary file 1 [file downloadSupplementary]
